# Supplementary material for: Latent Tuberculosis Infection and the Risk of Subsequent Cancer
Source: PubMed Central journal article supplement — Medicine (Baltimore). 2016 Jan 29;95(4):e2352. doi: 10.1097/MD.0000000000002352 (PMC5291550; doi:10.1097/md.0000000000002352), 2016-01-29
Supplement: medi-95-e2352-s001.pdf [file medi-95-e2352-s001.pdf]

**Supplemental Table 1. Characteristics of patients with and without subsequent cancer.**

| Characteristics         | Cancer          |      |                |      | <i>p</i> value |
|-------------------------|-----------------|------|----------------|------|----------------|
|                         | Yes (n = 1,077) |      | No (n =56,533) |      |                |
|                         | <i>n</i>        | %    | <i>n</i>       | %    |                |
| Age, years (mean ± SD)  | 59.63 ± 14.90   |      | 44.52 ± 16.67  |      |                |
| <65                     | 673             | 62.5 | 49,287         | 87.2 | <0.001         |
| ≥65                     | 404             | 37.5 | 7,246          | 12.8 |                |
| Sex                     |                 |      |                |      |                |
| Female                  | 591             | 54.9 | 32,234         | 57.0 | 0.162          |
| Male                    | 486             | 45.1 | 24,299         | 43.0 |                |
| Comorbidities           |                 |      |                |      |                |
| TB contact              | 191             | 17.7 | 11,331         | 20.0 | 0.066          |
| Diabetes mellitus       | 236             | 21.9 | 5,992          | 10.6 | <0.001         |
| Coronary heart disease  | 245             | 22.7 | 6,137          | 10.9 | <0.001         |
| Heart failure           | 42              | 3.9  | 948            | 1.7  | <0.001         |
| Cerebrovascular disease | 158             | 14.7 | 3,961          | 7.0  | <0.001         |
| Hypertension            | 482             | 44.8 | 12,674         | 22.4 | <0.001         |
| SLE                     | 30              | 2.8  | 756            | 1.3  | <0.001         |
| RA                      | 37              | 3.4  | 892            | 1.6  | <0.001         |
| CKD/ESRD                | 111             | 10.3 | 2,701          | 4.8  | <0.001         |
| Liver cirrhosis         | 131             | 12.2 | 2,676          | 4.7  | <0.001         |
| Asthma                  | 217             | 20.1 | 8,110          | 14.3 | <0.001         |
| COPD                    | 8189            | 17.5 | 4,567          | 8.1  | <0.001         |
| NTM                     | 5               | 0.5  | 166            | 0.3  | 0.257          |
| Income Level            |                 |      |                |      | <0.001         |
| Low                     | 450             | 41.8 | 20,153         | 35.6 |                |
| Intermediate            | 473             | 43.9 | 25,485         | 45.1 |                |
| High                    | 154             | 14.3 | 10,895         | 19.3 |                |

Abbreviations: SD, standard deviation; SLE, systemic lupus erythematosus; RA, rheumatoid arthritis; CKD, chronic renal disease; ESRD, end-stage renal disease; GERD, gastro-esophageal reflux disease; COPD, chronic obstructive pulmonary disease; NTM, nontuberculous mycobacteria.

**Supplemental Table 2. Predictors of cancer in Cox proportional hazards regression analysis**

| Variables               | Unadjusted       |          | Adjusted*        |          |
|-------------------------|------------------|----------|------------------|----------|
|                         | HR (95% CI)      | <i>p</i> | HR (95% CI)      | <i>p</i> |
| TB contact              | 0.97 (0.83–1.14) | 0.714    |                  |          |
| Age ≥ 65 years          | 4.15 (3.67–4.70) | <0.001   | 3.00 (2.55–3.53) | <0.001   |
| Male gender             | 1.16 (1.03–1.31) | 0.017    | 1.23 (1.09–1.39) | 0.001    |
| Comorbidities           |                  |          |                  |          |
| Diabetes mellitus       | 2.44 (2.11–2.82) | <0.001   | 1.24 (1.05–1.45) | 0.012    |
| Coronary heart disease  | 2.44 (2.12–2.81) | <0.001   | 1.00 (0.84–1.19) | 0.983    |
| Heart failure           | 2.81 (2.06–3.82) | <0.001   | 1.00 (0.72–1.38) | 0.977    |
| Cerebrovascular disease | 2.41 (2.04–2.85) | <0.001   | 0.90 (0.74–1.09) | 0.288    |
| Hypertension            | 2.82 (2.50–3.18) | <0.001   | 1.46 (1.25–1.72) | <0.001   |
| SLE                     | 2.34 (1.62–3.36) | <0.001   | 1.76 (1.22–2.55) | 0.003    |
| RA                      | 2.20 (1.58–3.05) | <0.001   | 1.28 (0.92–1.79) | 0.148    |
| CKD/ESRD                | 2.37 (1.95–2.89) | <0.001   | 1.18 (0.96–1.46) | 0.119    |
| Liver cirrhosis         | 2.52 (2.10–3.02) | <0.001   | 1.75 (1.45–2.12) | <0.001   |
| Asthma                  | 1.55 (1.33–1.80) | <0.001   | 0.99 (0.84–1.16) | 0.875    |
| COPD                    | 2.38 (2.04–2.79) | <0.001   | 1.15 (0.96–1.38) | 0.141    |
| NTM                     | 1.87 (0.78–4.51) | 0.162    |                  |          |
| Income level            |                  |          |                  |          |
| Low                     | Referent         |          | Referent         |          |
| Intermediate            | 0.90 (0.79–1.02) | 0.098    | 1.12 (0.98–1.28) | 0.085    |
| High                    | 0.82 (0.75–0.90) | <0.001   | 0.96 (0.79–1.16) | 0.671    |

Abbreviations: SD, standard deviation; SLE, systemic lupus erythematosus; RA, rheumatoid arthritis; CKD, chronic renal disease; ESRD, end-stage renal disease; GERD, gastroesophageal reflux disease; COPD, chronic obstructive pulmonary disease; NTM, nontuberculous mycobacteria.

\* All factors with  $p < 0.1$  in univariate analyses were included in the Cox multivariate analysis.

Supplemental Figure 1 Flow diagram summarizing the process of enrollment and follow-up.

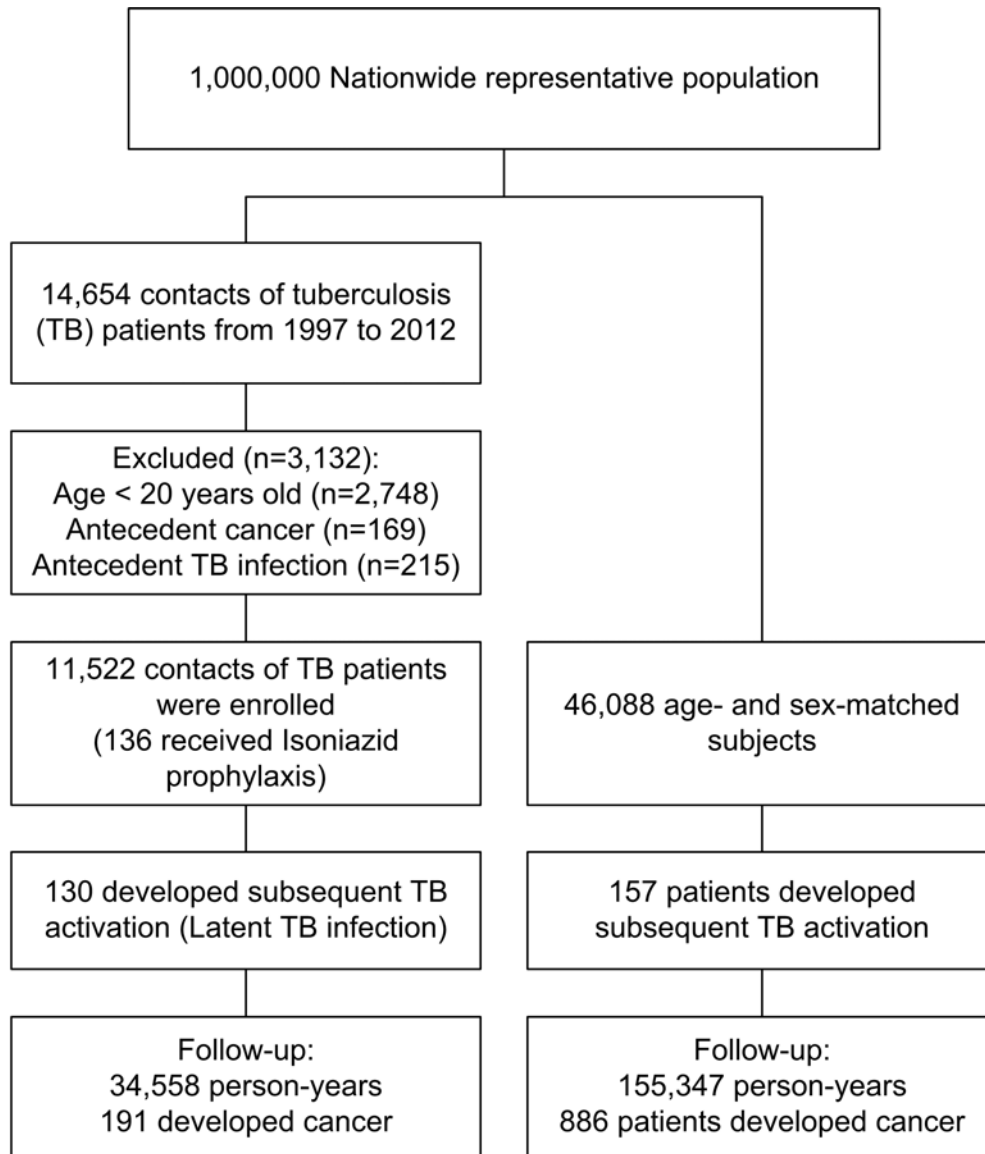

Supplemental Figure 2 Cumulative incidence of cancer in latent tuberculosis infection (LTBI) patients with and without isoniazid (INH) prophylaxis

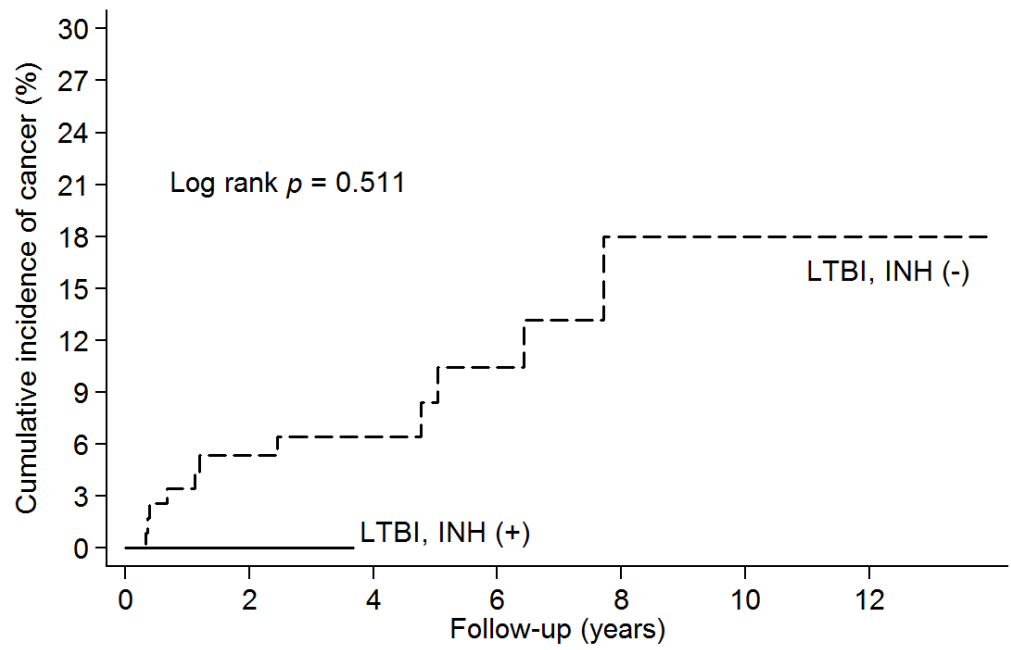

Number at risk

|               |     |    |    |    |    |   |   |
|---------------|-----|----|----|----|----|---|---|
| LTBI, INH (-) | 121 | 87 | 63 | 36 | 15 | 5 | 2 |
| LTBI, INH (+) | 9   | 2  | 0  | 0  | 0  | 0 | 0 |
